# Supplementary material
Source: Elsevier journal article supplement (https://rcastoragev2.blob.core.windows.net/e2045ce19a20e64b035cab6e09cbb208/mmc1.pdf)
Supplement: mmc1 [file mmc1.pdf]

**Cell Reports, Volume 32**

## **Supplemental Information**

### **PTPN2 Deficiency Enhances Programmed**

### **T Cell Expansion and Survival Capacity**

### **of Activated T Cells**

**Markus Flosbach, Susanne G. Oberle, Stefanie Scherer, Jana Zecha, Madlaina von Hoesslin, Florian Wiede, Vijaykumar Chennupati, Jolie G. Cullen, Markus List, Josch K. Pauling, Jan Baumbach, Bernhard Kuster, Tony Tiganis, and Dietmar Zehn**

Fig. S1

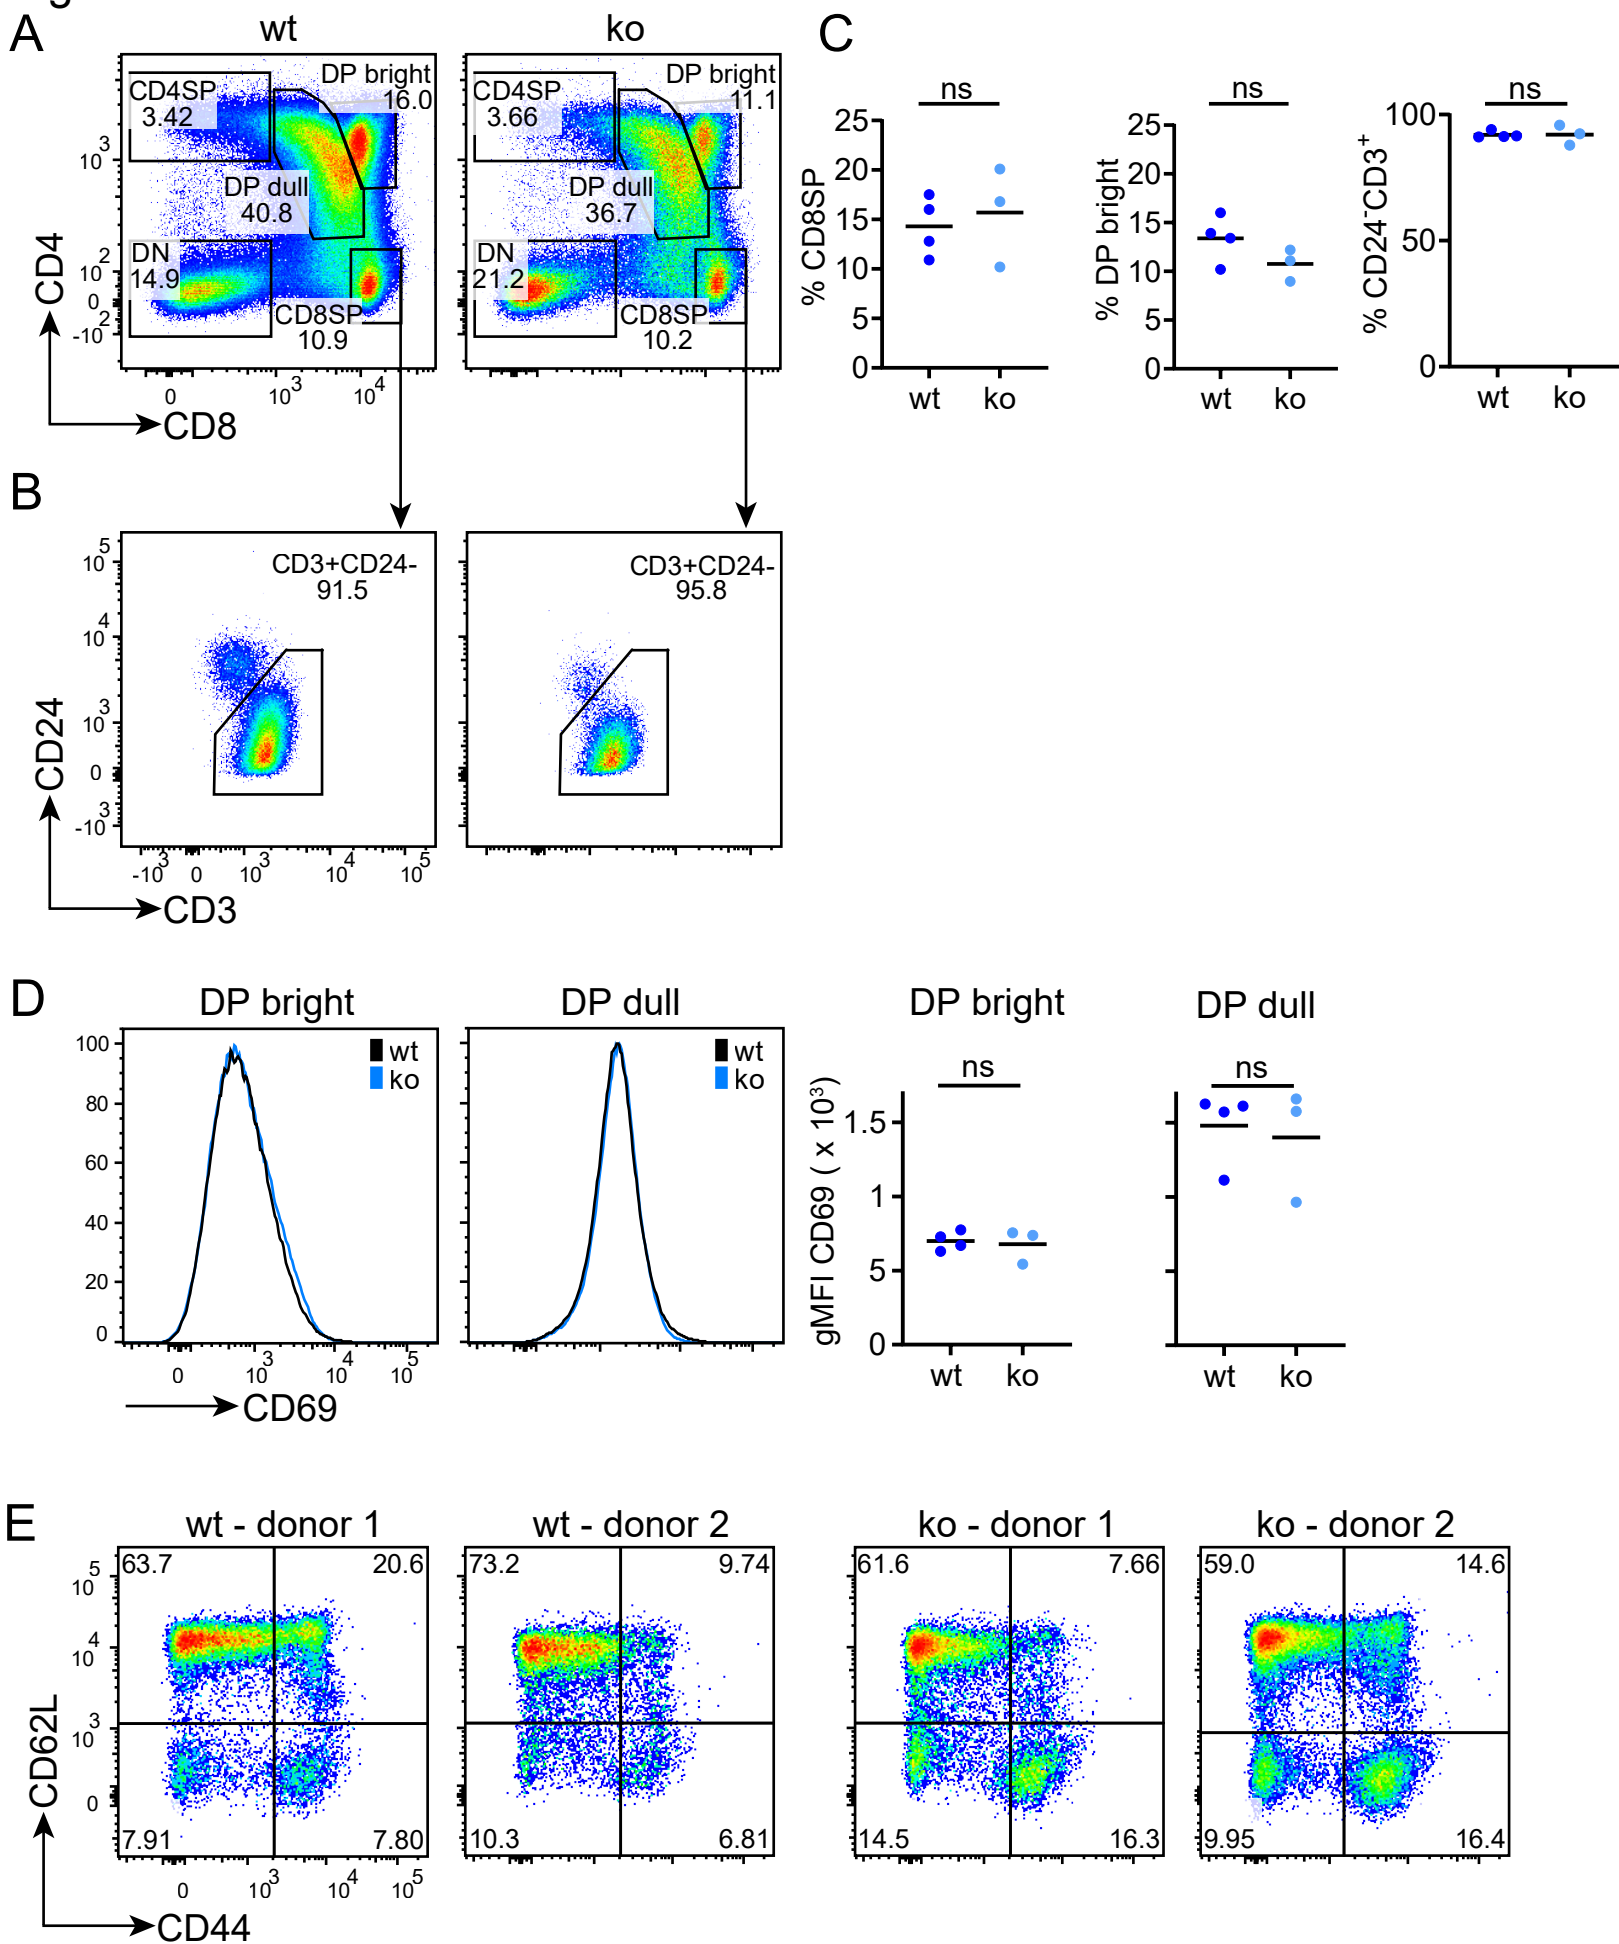

**Figure S1: Absence of PTPN2 does not impair thymic development. Related to Figure 1.** The thymi of OT-I;*Lck-Cre;Ptpn2<sup>fl/fl</sup>* (ko) and OT-I;*Ptpn2<sup>fl/fl</sup>* (wt) mice were taken from donors at the age of 6-10 weeks. **A)** Frequencies of developing T cells among total thymocytes were determined by flow cytometry and FACS plots of the major developmental stages of two mice are shown. Data are representative of seven donor mice. SP: single positive, DP: double positive, DN: double negative **B)** The FACS plots show the percentage of CD24<sup>-</sup>CD3<sup>+</sup> cells of CD8<sup>-</sup> single positive cells. **C)** The dot plots show the summary of all 7 animals and each dot represents one individual mouse, horizontal lines the mean. **D)** The histograms show a representative overlay of the CD69 expression levels of the CD8<sup>+</sup>CD4<sup>+</sup> bright and dull populations and the dot plots show the geometric mean fluorescent intensity (gMFI) of all seven animals. **E)** The FACS plots show the pre-activation status of isolated OT-I CD8 T cells by means of CD44 and CD62L expression of 4 individual donor mice that were used in our experiments. Statistical analysis: unpaired t-test. ns (not significant)  $p \geq 0.05$ .

Fig. S2

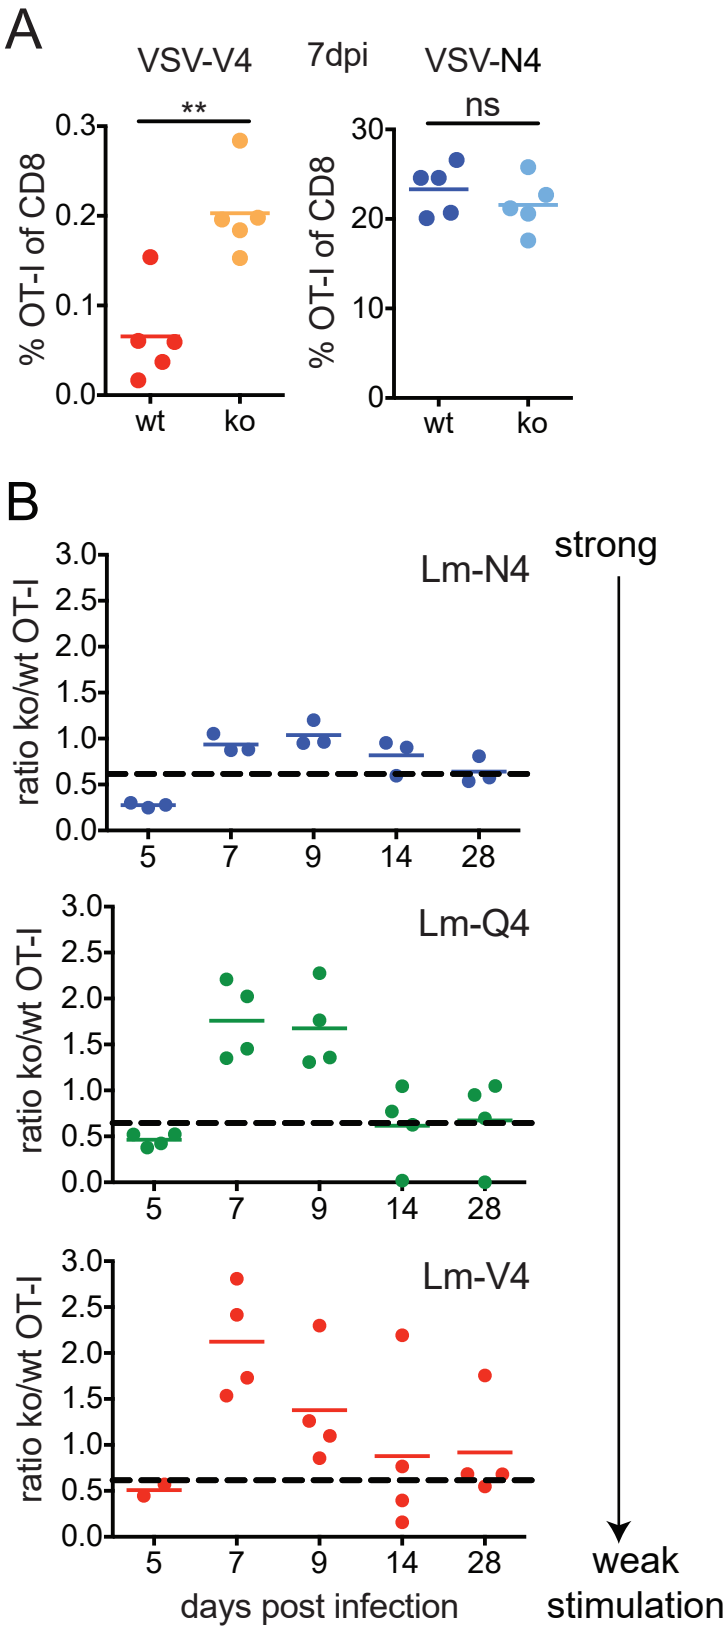

**Figure S2: Absence of PTPN2 delays the onset of T cell contraction. Related to Figures 1 and 2.** CD45-congenic C57BL/6J host mice received  $10^4$  OT-I;*Lck-Cre;Ptpn2<sup>fl/fl</sup>* (ko) and OT-I;*Ptpn2<sup>fl/fl</sup>* (wt) CD8 T cells and were infected 24 hours later with ovalbumin-expressing pathogens. **A)** Frequencies of OT-I T cells among total CD8 T cells in the spleen were determined by flow cytometry 7 days after infection with  $2 \times 10^6$  PFU VSV-V4 or VSV-N4. Data are representative of three independent experiments, with at least four mice per group. **B)** Plots show the ratio of ko/wt OT-I T cells at different time-points following infection with 1000 CFU Lm-N4 (SIINFEKL), Lm-Q4 (SIQFEKL), or Lm-V4 (SIIVFEKL), which provide high, intermediate or low avidity ligands for OT-I T cells. The dashed line represents the initial engraftment ratios determined 1 day after transfer of a higher amount of wt or ko OT-I T cells of the same mixture in uninfected hosts. The data are representative of two independent experiments with 3-5 mice. Dots in all panels represent one individual mouse, horizontal lines the mean. Statistical analysis: unpaired t-test. \*\* $p \leq 0.001$ , ns (not significant)  $p \geq 0.05$ .

Fig. S3

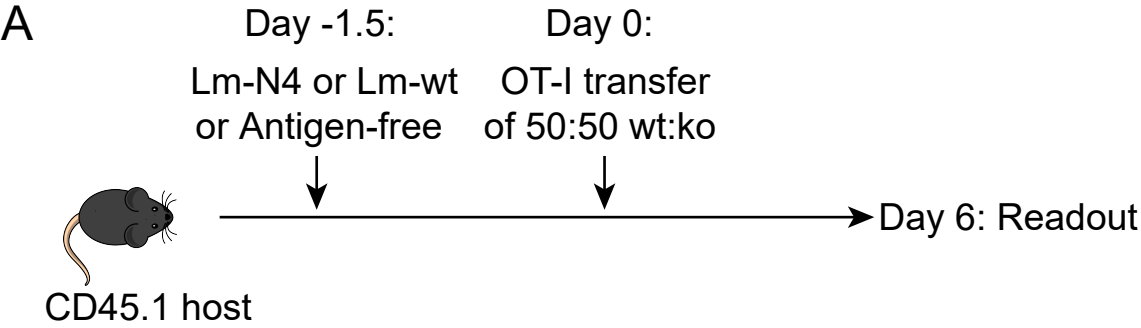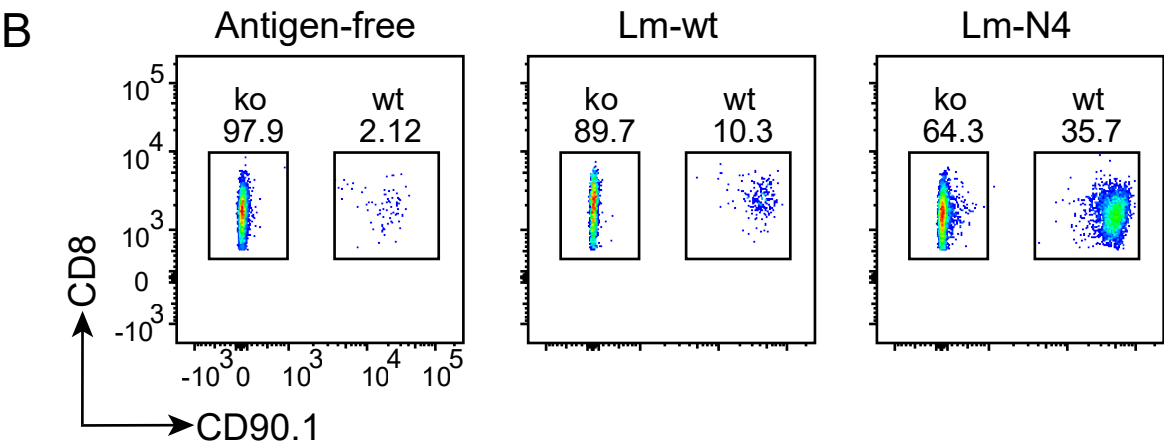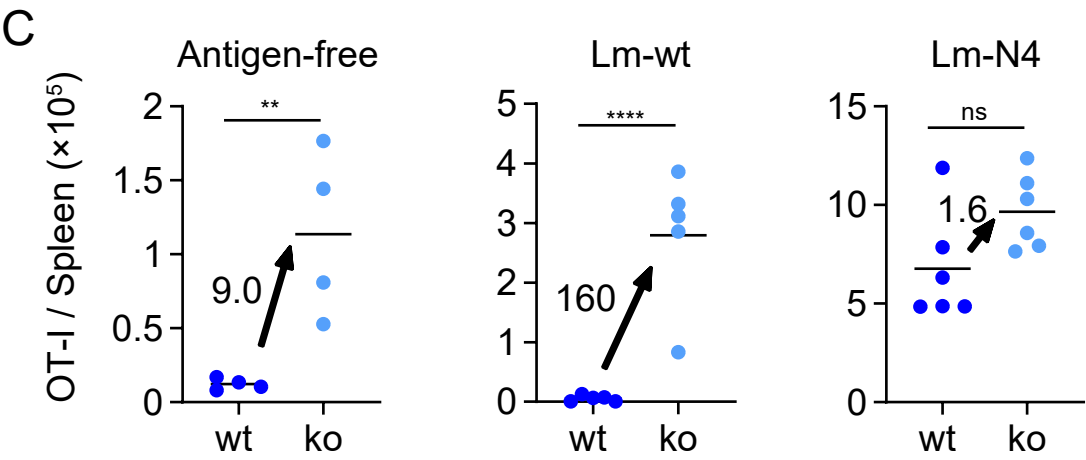

**Figure S3: Pre-activated PTPN2-deficient T cells expand significantly in response to antigen. Related to Figure**

**3. A)** CD45-congenic C57BL/6J host mice were infected with 1000 CFU Lm-N4 or Lm-wt or kept antigen-free for 36 hours before receiving  $5 \times 10^4$  OT-I;*Lck-Cre;Ptpn2<sup>fl/fl</sup>* (ko) mixed with  $5 \times 10^4$  OT-I;*Ptpn2<sup>fl/fl</sup>* (wt) CD8 T cells that both had been activated *ex vivo* for 36 hours. **B)** Numbers of OT-I T cells in the spleen were determined by flow cytometry 7.5 days after infection and representative FACS plots of one mouse of each condition are displayed. **C)** The dot plots show the absolute numbers of OT-I T cells per spleen and each dot represents one individual mouse, horizontal lines the mean.

Data are representative of two independent experiments for the transfer in antigen-free hosts and one experiment for the transfer in infected hosts, with at least four mice per group. Statistical analysis: unpaired t-test. \*\*\*\* $p \leq 0.00001$ , \*\* $p \leq 0.001$ , \* $p \leq 0.01$ , ns (not significant)  $p \geq 0.05$ .

**Supplementary Table 1. Differentially phosphorylated tyrosine sites of PTPN2-deficient versus wt OT-I T cells. Related to Figure 4.**

| Proteins | Isoforms                                 | Positions within isoforms | Amino acid | log2 ko/wt | Localization probability | Score |
|----------|------------------------------------------|---------------------------|------------|------------|--------------------------|-------|
| Stat3    | P42227-3                                 | 704                       | Y          | 2.4        | 1.00                     | 115   |
| Stat3    | P42227;B7ZC18;P42227-2                   | 705;679;705               | Y          | 2.3        | 1.00                     | 138   |
| Stat5b   | P42232                                   | 699                       | Y          | 2.2        | 1.00                     | 122   |
| Stat5a   | P42230                                   | 694                       | Y          | 1.9        | 1.00                     | 108   |
| Stat4    | Q3V157;P42228                            | 693;694                   | Y          | 1.4        | 0.99                     | 116   |
| Vav1     | P27870;E9PXI0;Q8VDU4                     | 844;820;805               | Y          | 1.2        | 0.90                     | 51    |
| Ptpn18   | Q3V441;Q61152                            | 32;381                    | Y          | 1.2        | 0.77                     | 119   |
| Fyb      | O35601;O35601-2                          | 559;559                   | Y          | 1.1        | 1.00                     | 122   |
| Ptpn6    | P29351;P29351-2;P29351-3;G3UYY5          | 564;566;525;64            | Y          | 1.0        | 1.00                     | 108   |
| Mapk1    | P63085                                   | 185                       | Y          | 1.0        | 1.00                     | 190   |
| Pdap1    | Q3UHX2                                   | 70                        | Y          | 1.0        | 0.93                     | 120   |
| Srsf1    | H7BX95;Q6PDM2                            | 202;202                   | Y          | 0.9        | 0.98                     | 98    |
| Hist1h4a | P62806                                   | 52                        | Y          | 0.9        | 1.00                     | 118   |
| Pabpc1   | P29341                                   | 364                       | Y          | 0.8        | 1.00                     | 90    |
| Itsn2    | E9QNG1;B2RR82;Q9Z0R6;Q9Z0R6-2;A0A1W2P775 | 922;949;922;922;481       | Y          | 0.8        | 1.00                     | 138   |
| Cd28     | P31041                                   | 189                       | Y          | 0.7        | 1.00                     | 165   |
| Cblb     | Q3TTA7;B9EKI5;Q3TTA7-2                   | 889;845;737               | Y          | 0.6        | 1.00                     | 70    |
| Cfl1     | P18760;F8WGL3                            | 68;68                     | Y          | -0.7       | 0.87                     | 179   |

The OT-I CD8 T cells were activated for 30 hours *in vitro* with anti-CD3/anti-CD28 coupled beads and analyzed via mass spectrometry. The results were filtered for a combined MS-score of > 50 and a localization probability of > 0.75.
